# Supplementary material
Source: publisher figshare collection journal article supplement (https://acs.figshare.com/ndownloader/files/4324942)

# **J. CHEM. ENG. DATA**

## **SUPPORTING INFORMATION**

### **Measurements, Correlations and Mod. UNIFAC (Do) Prediction of (Solid - Liquid) Phase Equilibria Diagrams in Binary Systems (Aliphatic Ketone + an Alcohol)**

**Urszula Domańska,\* Kamil Paduszyński, and Joanna Dąbska**

Department of Physical Chemistry, Faculty of Chemistry, Warsaw University of Technology,

Noakowskiego 3, 00-664 Warsaw, Poland

**Figure 1S.** DSC plot of heptan-2-one.

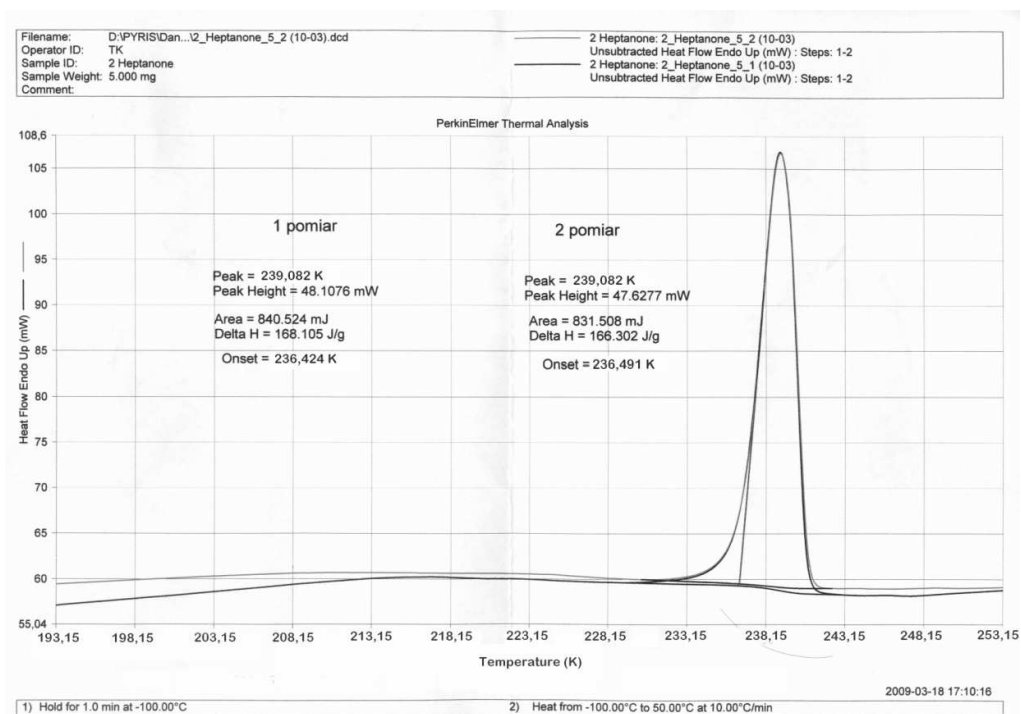

**Figure 2S.** DSC plot of nonan-2-one.

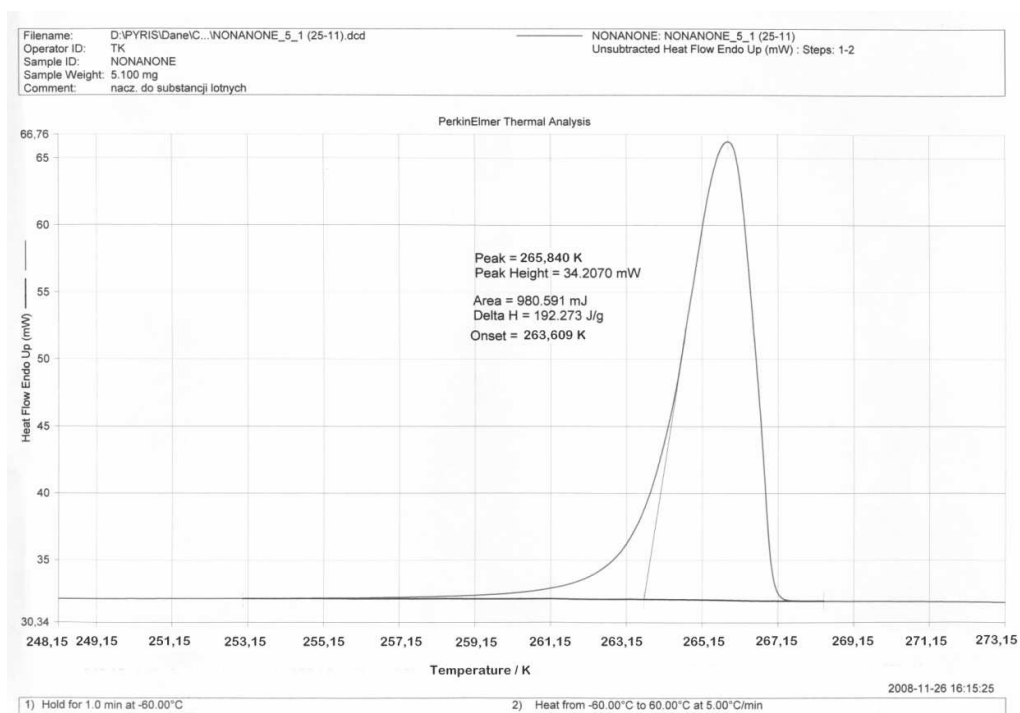

**Figure 3S.** DSC plot of undecan-2-one.

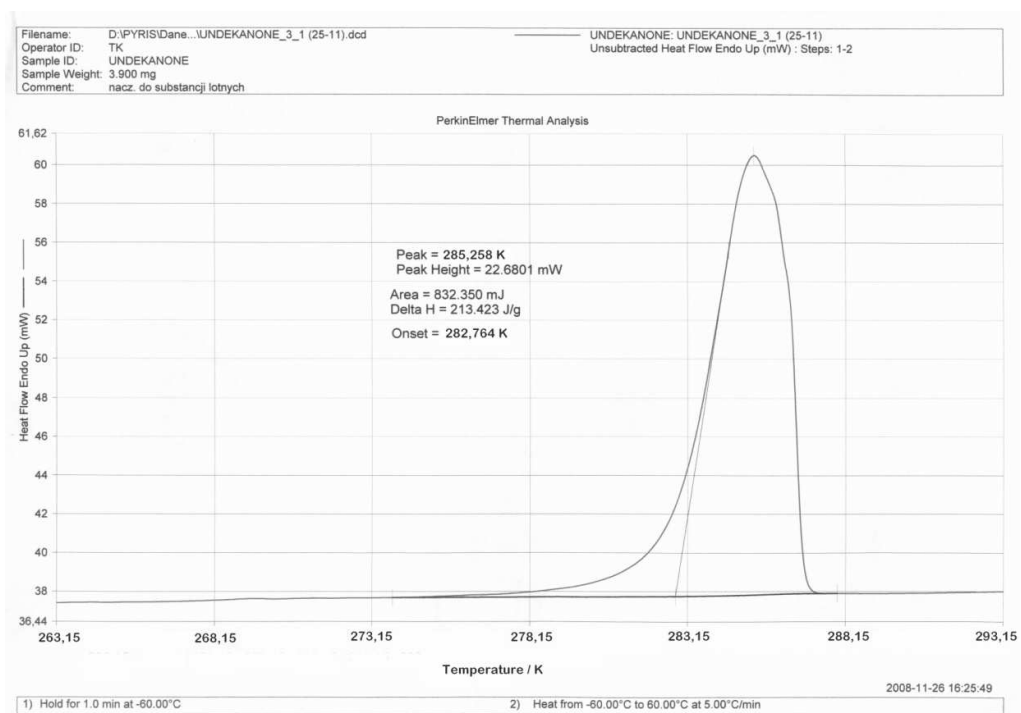

**Figure 4S.** DSC plot of dodecan-2-one.

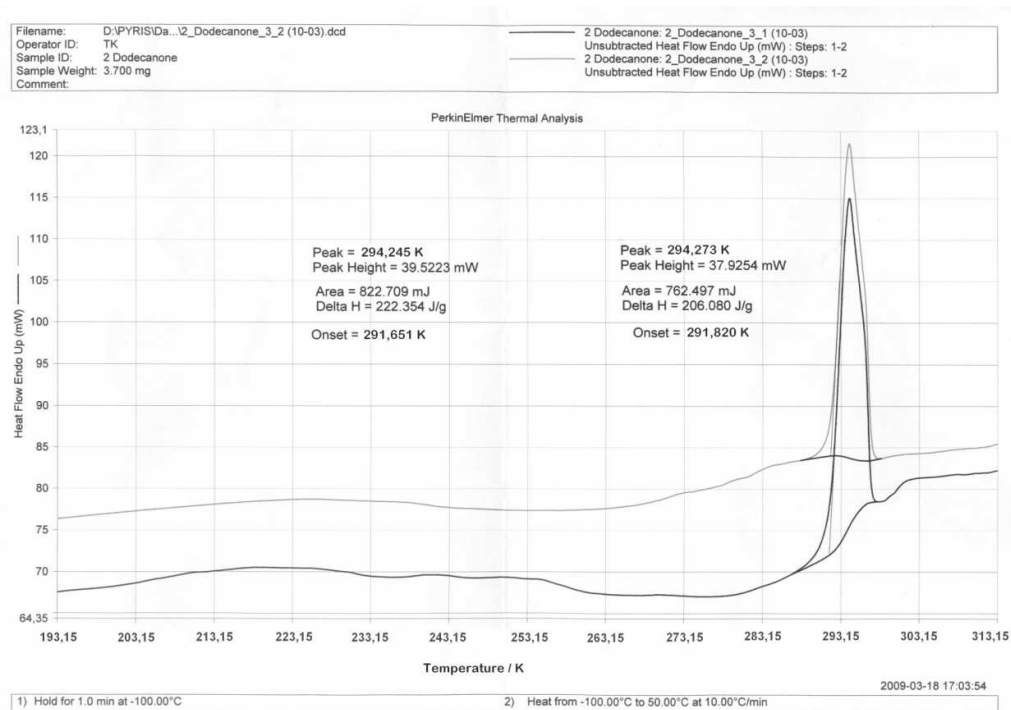

**Figure 5S.** DSC plot of tridecan-2-one.

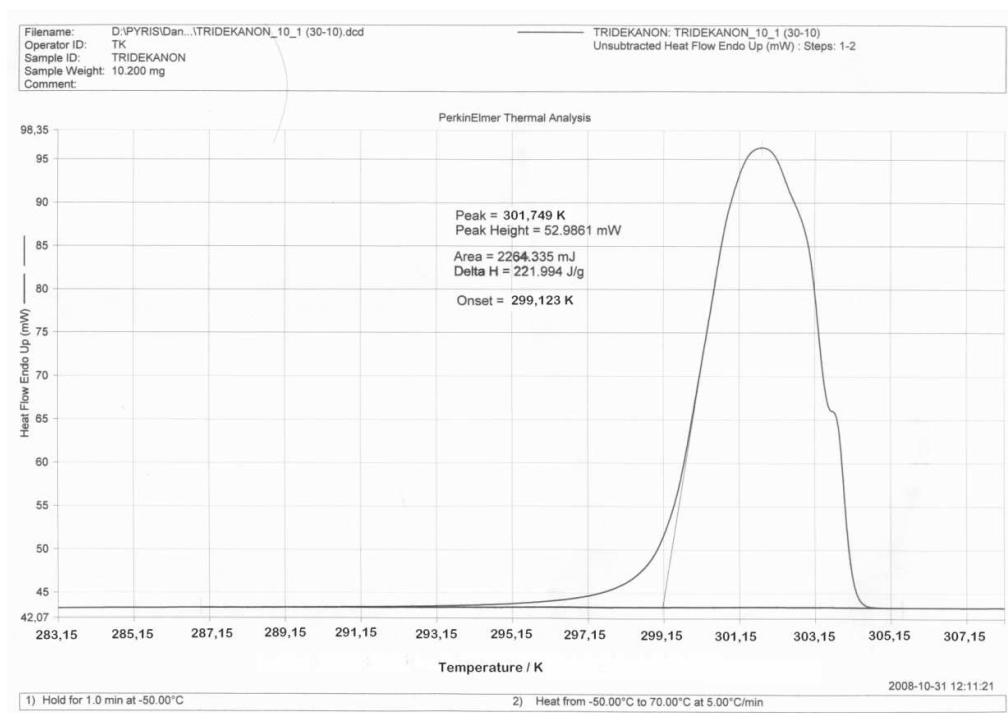

Supplement: Supplementary file 1 [file 4324942]
